# Supplementary material for: Quantitative Analysis of Acetone in Transformer Oil Based on ZnO NPs@Ag NWs SERS Substrates Combined with a Stoichiometric Model
Source: MDPI journal article supplement (doi:10.3390/ijms232113633), 2022-11-07
Supplement: s1 [file s1]

# Quantitative analysis of acetone in transformer oil based on ZnO NPs@Ag NWs SERS substrates combined with stoichiometric model

Xinyuan Zhang, Yu Lei, Ruimin Song, Weigen Chen\*, Changding Wang, Ziyi Wang, Zhixian Yin and Fu Wan

State Key Laboratory of Power Transmission Equipment & System Security and New Technology, Chongqing University, Chongqing 400044, China

\* Correspondence: weigench@cqu.edu.cn (W.C.)

## S1. TEM of pristine Ag NWs

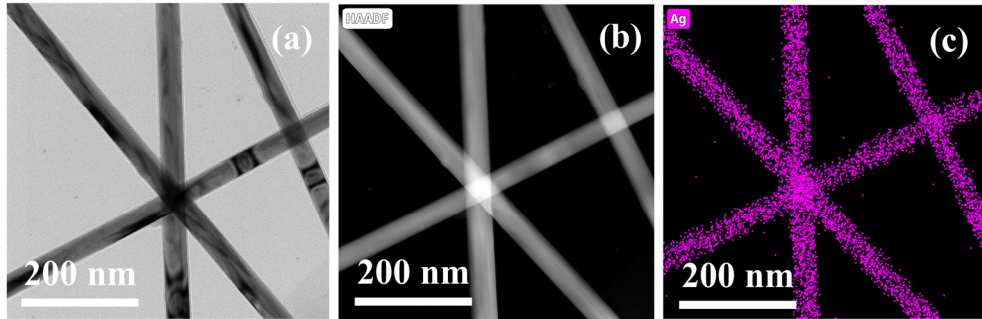

**Figure S1.** TEM of pristine Ag NWs. TEM image (a), HAADF (b), and EDS mapping images (c) of pristine Ag NWs.

## S2. Calculation of EF value

We used R6G as a probe molecular (probe molecular) to evaluate the enhancement effect of AgNWs@ZnO. The enhancement factor (EF) was calculated by the following equation:

$$EF_{SERS} = \frac{I_{SERS} / N_{SERS}}{I_{out} / N_{out}} \quad (4)$$

where  $I_{SERS}$  and  $I_{out}$  are the effective intensities of the characteristic peaks with and without ZnO NPs@Ag NWs substrates for the probe molecules, respectively,  $N_{SERS}$  and  $N_{out}$  are the numbers of the probe molecules within detection volume on the substrates with and without ZnO NPs@Ag NWs, respectively.

As in Figure S2, with  $1650 \text{ cm}^{-1}$  as the Raman characteristic peak, the intensity  $I_{SERS}$  for  $10^{-6} \text{ M}$  R6G on the SERS substrates is about 528.498 with ZnO NPs@Ag NWs, and the intensity  $I_{out}$  for  $10^{-6} \text{ M}$  R6G on the Si substrate is about 12.5582 without ZnO NPs@Ag NWs.

Since the Raman measurement and the conditions of the preparation are the same for substrates with and without ZnO NPs@Ag NWs, thus they have identical detection volumes and similar surface areas for molecules absorbed. Therefore,  $N_{SERS}$  and  $N_{out}$  are mainly determined by the concentration of R6G. The calculated value of  $N_{SERS} / N_{out} = C_{SERS} / C_{out} = 10^6$ .

Thus, the  $EF @1649 \text{ cm}^{-1}$  of the ZnO NPs@Ag NWs substrates is estimated to be  $4.21 \times 10^7$ .

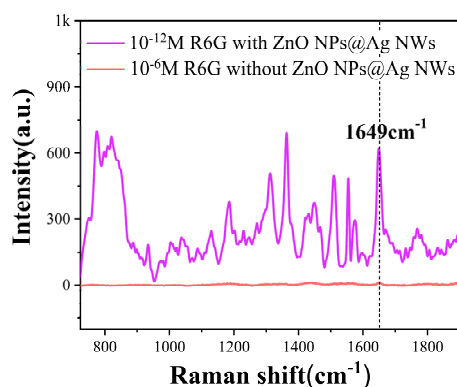

**Figure S2.** SERS spectrum of  $10^{-12}$  M R6G with ZnO NPs@Ag NWs substate and Raman spectrum of  $10^{-6}$  M R6G without ZnO NPs@Ag NWs

### S3. Schematic diagram for the CT process

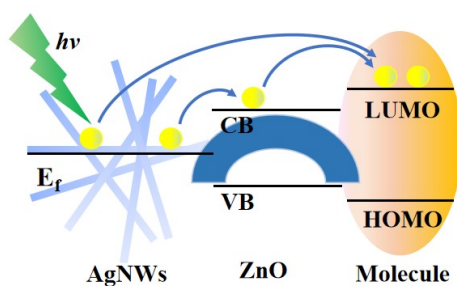

**Figure S3.** Schematic diagram for the CT process between ZnO, AgNWs, and the probe molecules

### S4. SERS mapping

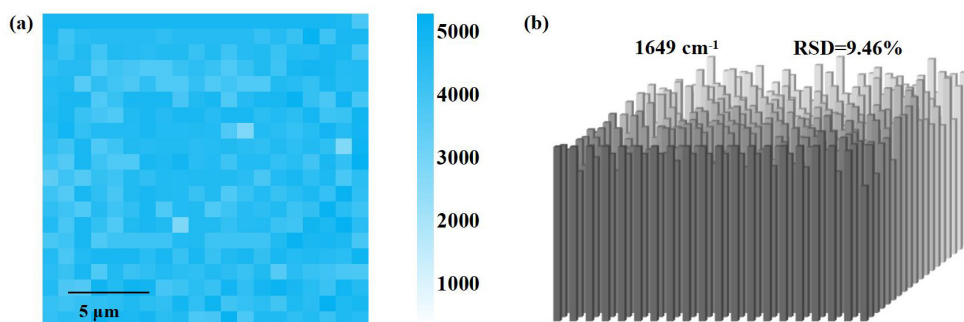

**Figure S4.** (a) SERS map of R6G at  $1649\text{ cm}^{-1}$ ; and corresponding histograms (b) for the above mapping area.

Raman mapping spectra was obtained by using a Renishaw in Via Raman microscope with a 600 lines/mm grating and a 514 nm laser. The incident laser beam was focused by a 50 × objective and the laser power on the samples was kept 0.5 mW to avoid laser induced heating.

S5. Original SERS spectra

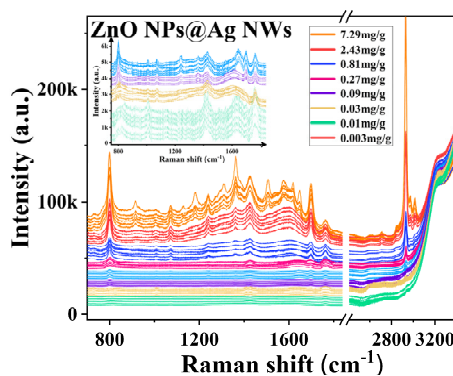

**Figure S5.** Original SERS spectra of different concentration acetone extracts (The inset shows the local magnification of 0.09 mg/g, 0.03 mg/g, 0.01 mg/g and 0.003 mg/g).

S6. Evaluation parameters of PLS models with different spectral preprocessing methods.

**Table S1.** Evaluation parameters of PLS models with different spectral preprocessing methods.

| preprocessing method | PCs | R <sub>c</sub> | RMSECV   | R <sub>p</sub> | RMSEP    |
|----------------------|-----|----------------|----------|----------------|----------|
| None                 | 4   | 0.214842       | 0.992273 | 0.980813       | 0.327962 |
| SG                   | 4   | 0.213069       | 0.992400 | 0.982357       | 0.314489 |
| D1                   | 3   | 0.348660       | 0.979649 | 0.975247       | 0.372506 |
| SNV                  | 3   | 0.175760       | 0.994828 | 0.992777       | 0.201215 |
| MSC                  | 3   | 0.219932       | 0.991902 | 0.987239       | 0.267463 |
| Baseline             | 5   | 0.201398       | 0.993209 | 0.991935       | 0.212600 |
| SG + D1              | 3   | 0.312821       | 0.983617 | 0.9777         | 0.35356  |
| SG + SNV             | 4   | 0.163031       | 0.995550 | 0.994466       | 0.176127 |
| SG + MSC             | 3   | 0.199619       | 0.993329 | 0.989236       | 0.245646 |
| Baseline + SG        | 5   | 0.191552       | 0.993857 | 0.98547        | 0.285396 |
| Baseline + D1        | 3   | 0.308613       | 0.984055 | 0.977152       | 0.357880 |
| Baseline + SNV       | 5   | 0.128131       | 0.997251 | 0.997678       | 0.114081 |
| Baseline + MSC       | 3   | 0.217877       | 0.992053 | 0.996586       | 0.138331 |
